# Supplementary material for: Phase transition and molecular assembly structure of ellagic acid ester derivatives
Source: Royal Society of Chemistry journal article supplement (doi:10.1039/c8nj02609b), 2018-01-01
Supplement: c8nj02609b1.pdf [file c8nj02609b1.pdf]

## Supporting Information

### Phase Transition and Molecular Assembly Structure of Ellagic Acid Ester Derivative

Hisashi Tokutomi, JianYun Wu, Takashi Takeda, Norihisa Hoshino, and Tomoyuki Akutagawa

#### Contents

1. TG charts of crystals **1**, **2**, and **3**.
2. IR charts of crystals **1**, **2**, and **3**.
3. UV (solid line) and fluorescence (dashed line) spectra of **1** and **2** in THF.
4. CV charts of **1** and **2** in THF.
5. Theoretical DFT calculations of HOMO and LUMO.
6. DSC chart of **2**.
7. Atomic numbering scheme of molecule **1**.
8. The  $\pi$ -stacking arrangement in the regular stack in **1**.
9. Atomic numbering scheme of molecule **2**.
10. The  $\pi$ -stacking arrangement in the regular stack in **2**.
11. Imaginary part of dielectric constant **3**.
12. The DSC chart of **3** in the first and second thermal cycle.
13. Real part of dielectric constant **3** in the first heating process.

## Experimental section

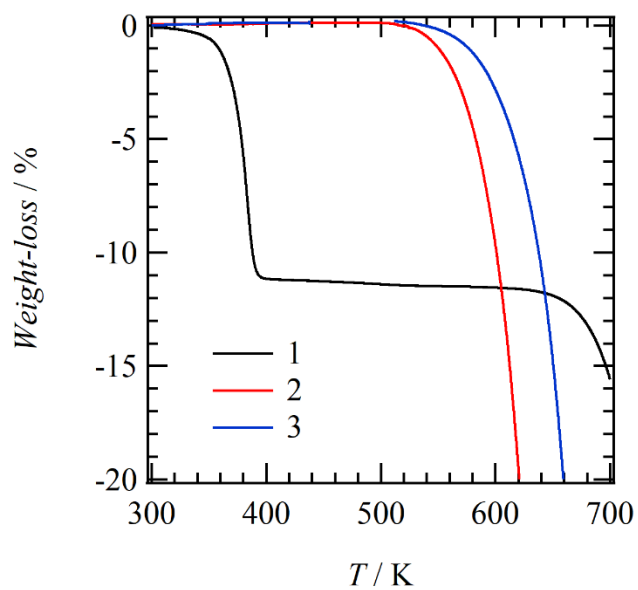

**Figure S1.** TG diagrams of crystals **1**, **2**, and **3**.

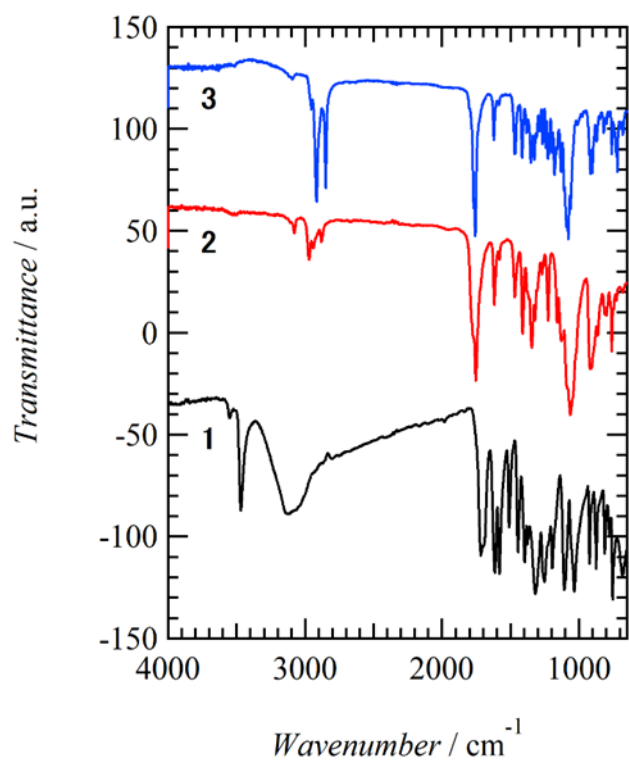

**Figure S2.** IR charts of crystals **1**, **2**, and **3** at KBr pellets.

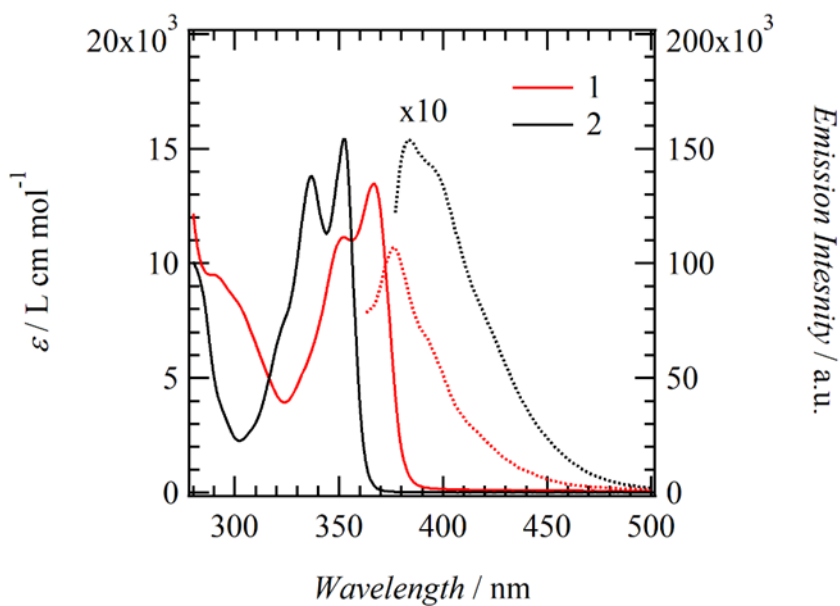

**Figure S3.** UV (solid line) and fluorescence (dashed line) spectra of **1** and **2** in THF. The emission intensity of **2** was ten times enlarged in contrast with that of **1**.

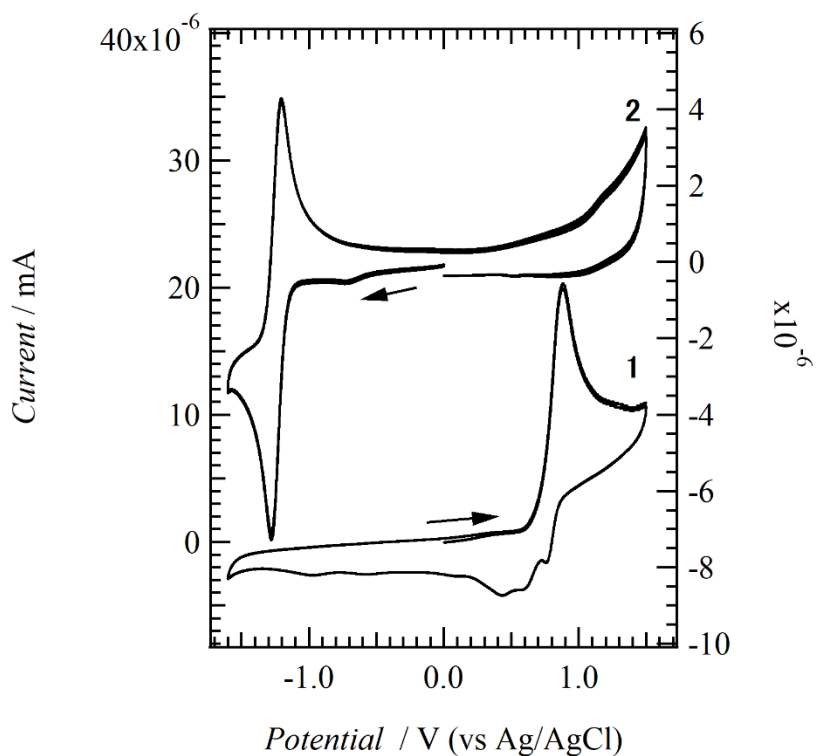

**Figure S4.** CV charts of **1** and **2** in THF (vs Ag/AgCl 0.1 M TBABF<sub>4</sub>). The oxidation and reduction waves were observed in **1** and **2**, respectively.

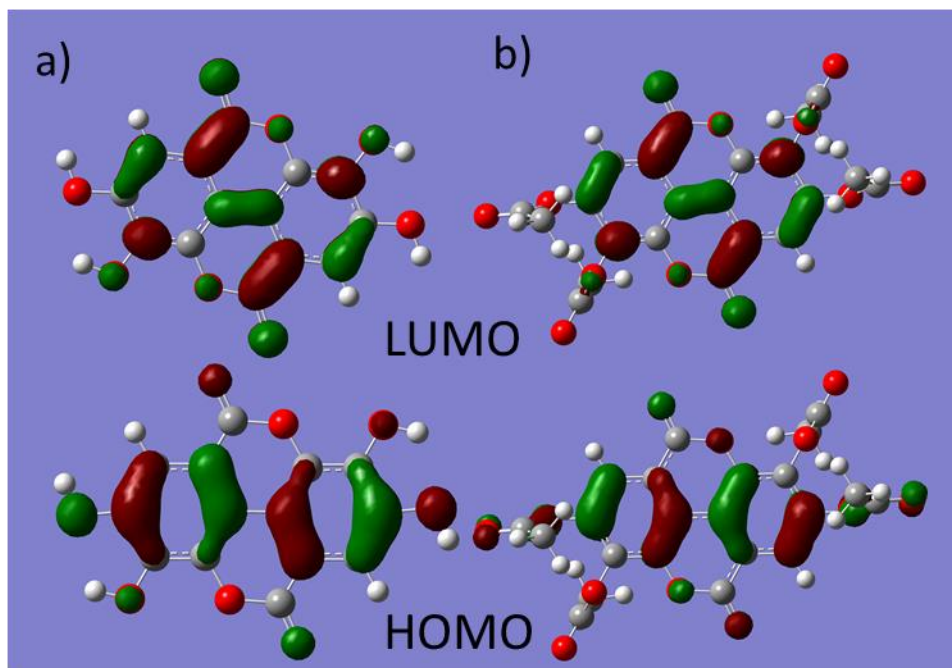

**Figure S5.** Theoretical DFT calculations of a) HOMO and b) LUMO for **1** (left) and methyl ester derivative (right) based on B3LYP/6-311G+(2d, p) basis set.

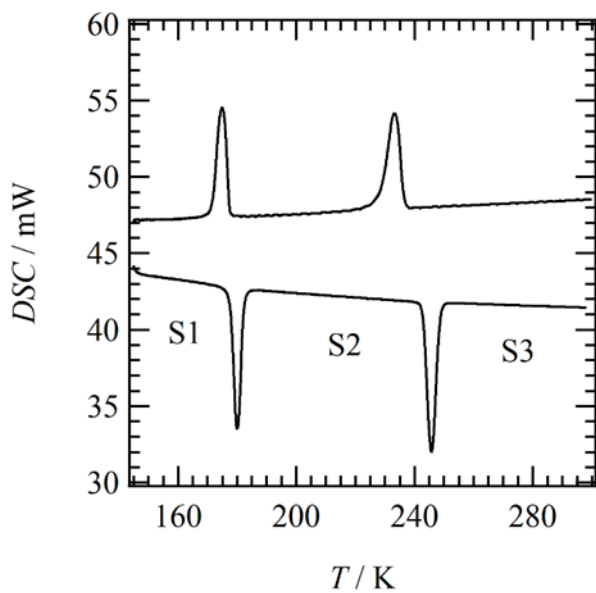

**Figure S6.** DSC chart of **2** in the temperature range from 150 to 300 K, where three kinds of solid phases of S1, S2, and S3 were reversibly observed.

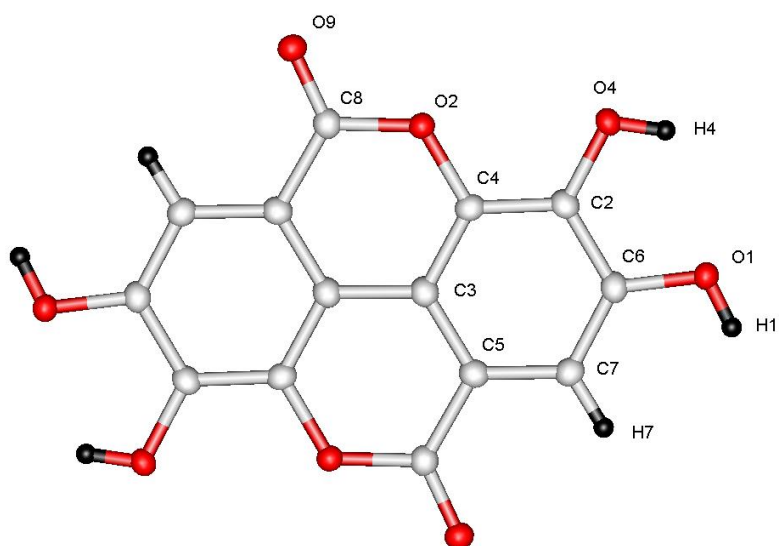

**Figure S7.** Atomic numbering scheme of molecule **1** in the single crystal X-ray structural analysis.

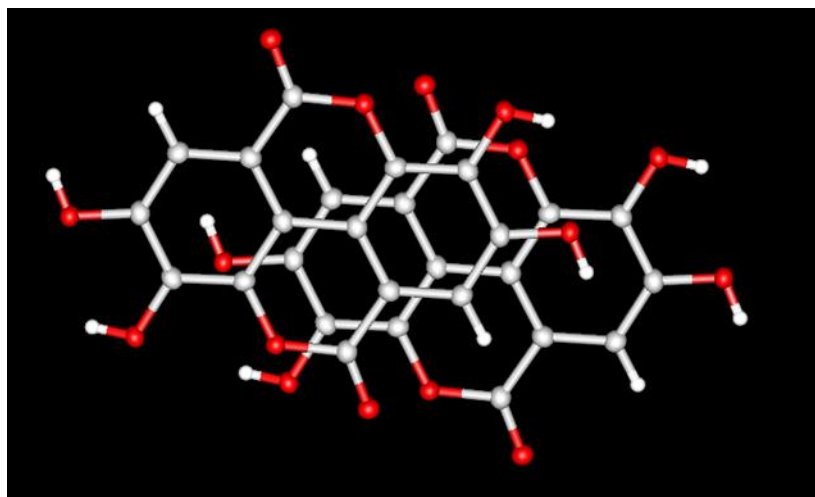

**Figure S8.** The  $\pi$ -stacking arrangement in the regular stack in **1**.

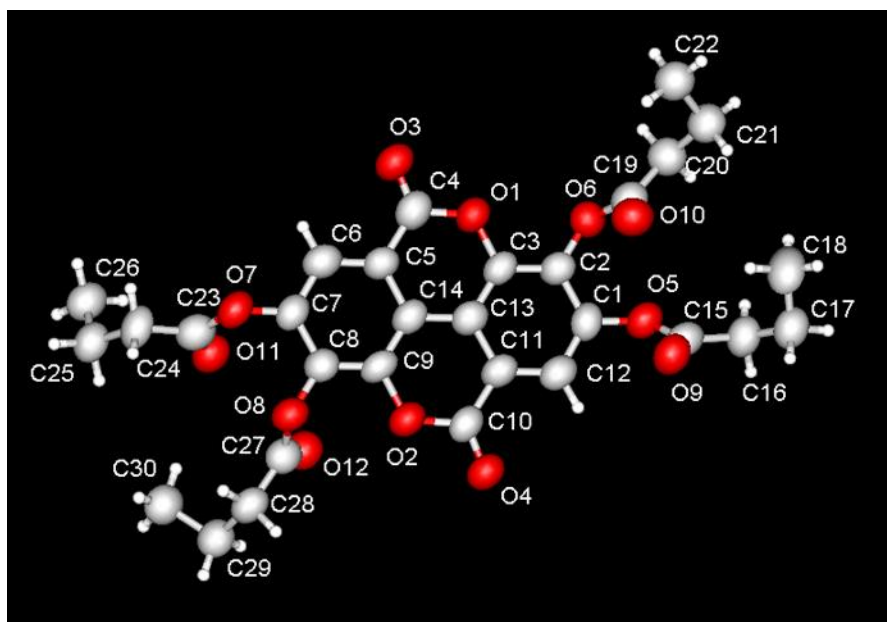

**Figure S9.** Atomic numbering scheme of molecule **2** in the single crystal X-ray structural analysis.

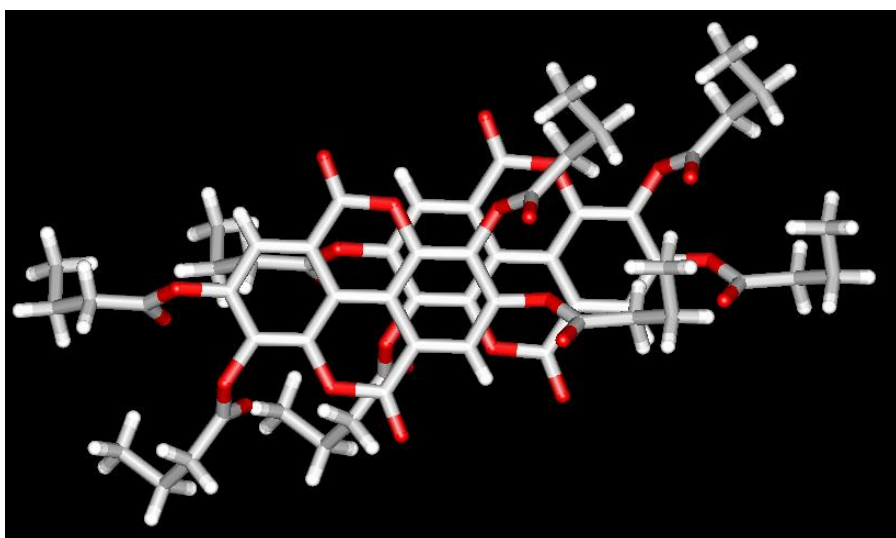

**Figure S10.** The  $\pi$ -stacking arrangement in the regular stack in **2**.

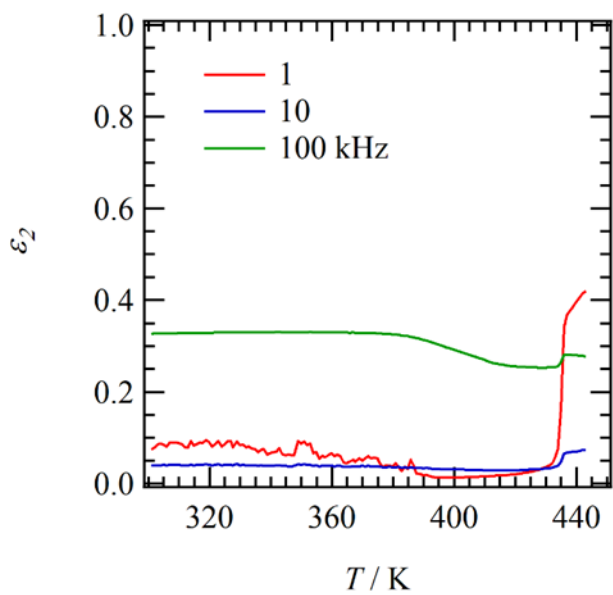

**Figure S11.** Imaginary part of dielectric constant **3**.

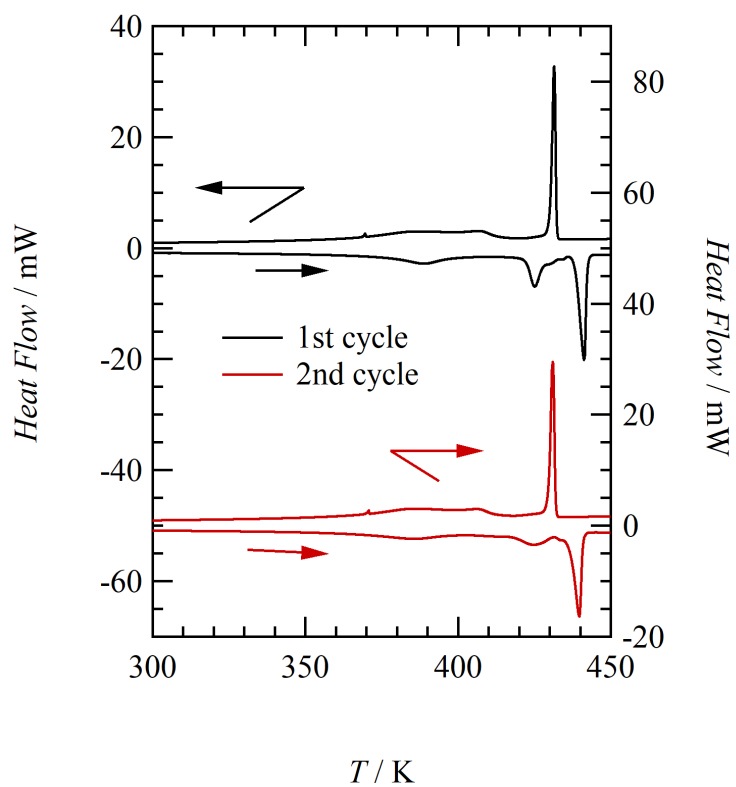

**Figure S12.** The DSC chart of **3** in the first and second thermal cycle.

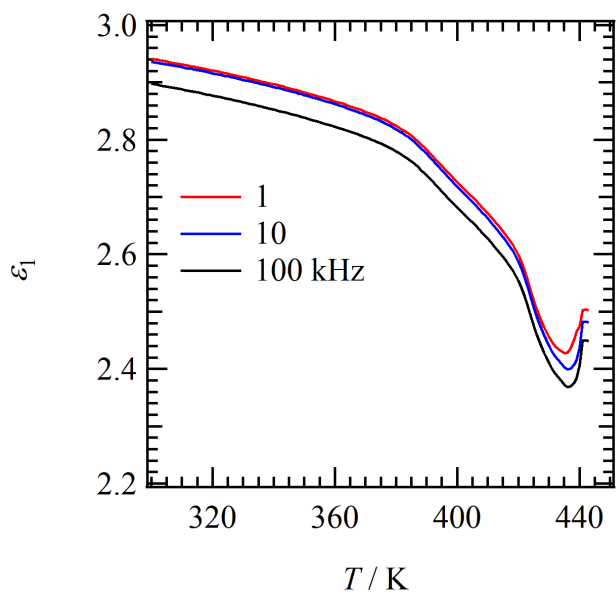

**Figure S13.** Real part of dielectric constant **3** in the first heating process.
